# Supplementary material
Source: publisher figshare collection journal article supplement (https://asha.figshare.com/articles/dataset/_/19241847)
Supplement: Supplementary file 1 [file 1]

## Supplemental Material S5. Proportion of syllables correct during probes per participant by condition.

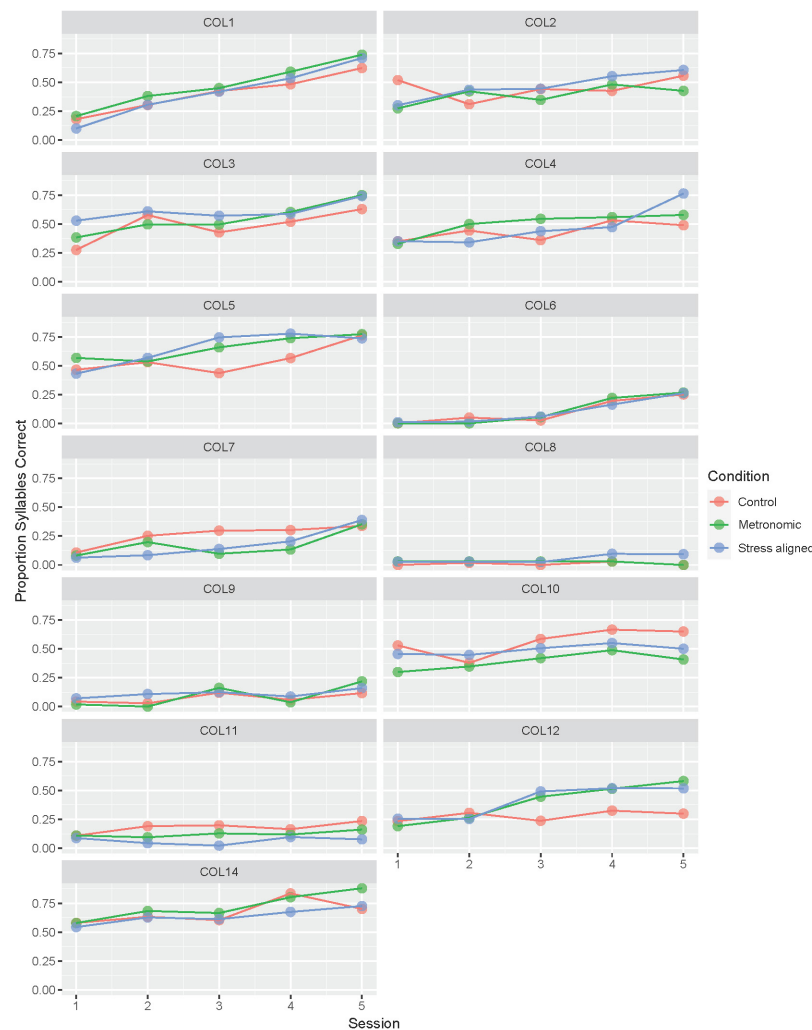

*Notes:* X-axis = number of sessions from 1 to 5. Y-axis = proportion of syllables correct. Red line = Control- condition. Blue line = Stress-aligned condition. Green line = Metronomic beat condition. Some participants benefited slightly more from the metronome condition (e.g., COL1) while others from the stress-aligned condition (e.g., COL2). However, it is important to note that none of the participants showed an unequivocal response to one of the rhythmically-enhanced conditions compared to the other. Future work with larger samples can better address whether detectable differences exist in terms of individual response to different types of rhythmic enhancement.
