# Supplementary material
Source: publisher figshare collection journal article supplement (https://asha.figshare.com/articles/dataset/_/19241847)

**Supplemental Material S2.** Example of experimental sentences and related images.

| Sentence                                                              | Number of words | Number of syllables | Syllabic stress                          |
|-----------------------------------------------------------------------|-----------------|---------------------|------------------------------------------|
| Estoy subiendo las escaleras<br><i>[I'm coming up stairs]</i>         | 4               | 10                  | S <u>S</u> S <u>S</u> S S S S <u>S</u> S |
| Estás llevando los alimentos<br><i>[You're bringing food]</i>         |                 |                     |                                          |
| Están mirando los animales<br><i>[They're looking at the animals]</i> |                 |                     |                                          |

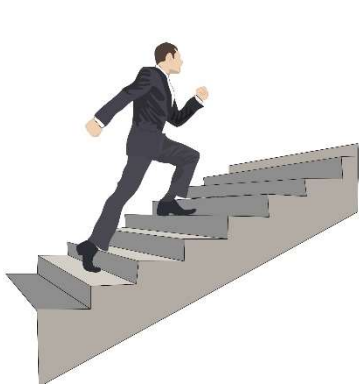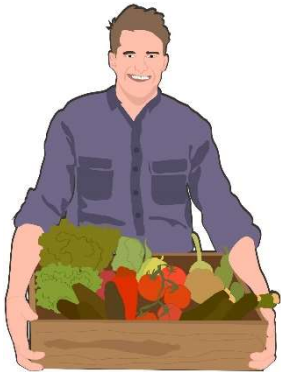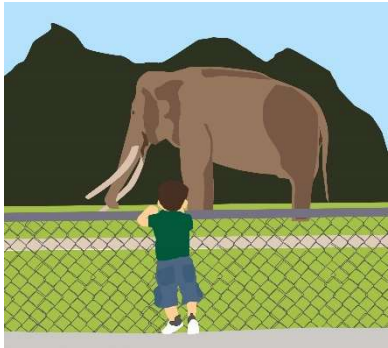

Supplement: Supplementary file 2 [file 1]
