# Supplementary material
Source: publisher figshare collection journal article supplement (https://asha.figshare.com/articles/dataset/_/19241847)
Supplement: Supplementary file 3 [file 1]

### Supplemental Material S3. Aims 1–2 model output.

```
glmer(cbind(successes,failures) ~ condition * session +
(1 + session | subject) + (1 + condition | sentence) + (1 | observations)
```

*Notes:* Condition was coded with two orthogonal contrasts, and session was centered.

#### Random effects:

| <i>Groups</i> | <i>Name</i>                   | <i>Variance</i> | <i>Std.Dev.</i> | <i>Corr</i> |      |
|---------------|-------------------------------|-----------------|-----------------|-------------|------|
| observations  | (Intercept)                   | 1.01023         | 1.0051          |             |      |
| sentence      | (Intercept)                   | 0.60928         | 0.7806          |             |      |
|               | conditioncontrol_vs_rhythm    | 0.05561         | 0.2358          | 0.27        |      |
|               | conditionmetron_vs_wordstress | 0.48445         | 0.6960          | -0.01       | 0.04 |
| participant   | (Intercept)                   | 2.60161         | 1.6129          |             |      |
|               | session                       | 0.04799         | 0.2191          | -0.19       |      |

*Number of obs:* 1943, *groups:* obs, 1943; sentence, 30; participant, 13

#### Fixed effects:

|                                       | <i>Estimate</i> | <i>Std. Error</i> | <i>z value</i> | <i>Pr(&gt; z )</i> |
|---------------------------------------|-----------------|-------------------|----------------|--------------------|
| (Intercept)                           | -1.16502        | 0.47087           | -2.474         | 0.0134 *           |
| conditioncontrol_vs_rhythm            | 0.02866         | 0.08094           | 0.354          | 0.7232             |
| conditionmetron_vs_wordstress         | 0.04145         | 0.15030           | 0.276          | 0.7827             |
| session                               | 0.40563         | 0.06562           | 6.181          | 6.36e-10 ***       |
| conditioncontrol_vs_rhythm:session    | 0.11858         | 0.04805           | 2.468          | 0.0136 *           |
| conditionmetron_vs_wordstress:session | -0.01021        | 0.05626           | -0.181         | 0.8560             |
