# Supplementary material
Source: publisher figshare collection journal article supplement (https://asha.figshare.com/articles/dataset/_/19241847)
Supplement: Supplementary file 4 [file 1]

## Supplemental Material S6. Motor speech assessment adapted to Spanish.

*Note: This motor speech assessment tool was adapted to Spanish for the current study, but it does not have normative data for Spanish-speaking populations. This tool lacks psychometric properties in these populations.*

Participante #: \_\_\_\_\_

Fecha: \_\_\_\_\_

### Tareas para evaluar la Programación Motora del Habla en Apraxia del habla\*

**Fluidez.** Use estos códigos† para notar falta de fluidez.

|                                      |          |                                           |
|--------------------------------------|----------|-------------------------------------------|
| Repetición de sílaba                 | (SYLR)   | “dón...dón...dónde esta la pelota?”       |
| Repetición incompleta de sílaba      | (INSYLR) | “yo fui a la s...s... sala”               |
| Repetición de unidades polisilábicas | (MSR)    | “esto es... esto es... esto es genial...” |
| Postura fija con aire audible        | (FPA)    | “mmmmiii esfero”                          |
| Postura fija sin aire audible        | (FPWO)   | “yo....(...)... compré...”                |

**Transcripción.** Transcriba la *primera respuesta completa* con estos diacríticos‡:

| Consonantes                           | Vocales                 |
|---------------------------------------|-------------------------|
| Prolongación [C:]                     | Prolongación [V:]       |
| Desonorización parcial [Ç]            | Lengua arriba [Y]       |
| Sonorización parcial [Ç]              | Lengua abajo [Y]        |
| Aspiración excesiva [C <sup>h</sup> ] | Lengua frontalizada [Y] |
| Otra distorsión [Č]                   | Lengua palatizada [Y]   |
|                                       | Otra distorsión [Ů]     |

**Códigos de Duffy.** Use los códigos para capturar comportamientos apráxicos:

|                                        |                                                                |
|----------------------------------------|----------------------------------------------------------------|
| Distorsiones (D)                       | Segregación silábica con palabras o frases polisilábicas (SxS) |
| Sustituciones distorsionadas (DS)      | Conciencia de errores (AOE)                                    |
| Adiciones distorsionadas (DA)          | Incremento de errores cuando se incrementa la velocidad (IR)   |
| Intentos de auto-corrección (SC)       | Incremento de errores cuando se incrementa la longitud (IL)    |
| Velocidad lenta (SR)                   |                                                                |
| Grupo articulatorio distorsionado (DG) |                                                                |

**Código de Porch.** Código numérico adaptado del *Porch Index of Communicative Ability* (Porch, 1967).

|                                             |                                                           |
|---------------------------------------------|-----------------------------------------------------------|
| 15 = Correcto en todo respecto              | 7 = Error claramente relacionado con la palabra objetivo. |
| 14 = Distorsionado                          | 6 = Error no relacionado con la palabra objetivo          |
| 13 = Retrasado                              | 5 = Rechazo o manifestación de inhabilidad                |
| 10 = Error articulatorio autocorregido      | 4 = Ininteligible pero diferenciado de otras respuestas.  |
| 9 = Correcto después de repetir el estímulo | 3 = Ininteligible y no diferenciado de otras respuestas.  |

\*Basado en Duffy, J.R. (2013). *Motor speech disorders: Substrates, differential diagnosis, and management* (3rd ed.). St. Louis: Elsevier Mosby.

†Teesson, K., Packman, A., & Onslow, M. (2003). The Lidcombe Behavioral Data Language of stuttering. *Journal of Speech, Language & Hearing Research*, 46(4), 1009-1015.

‡Haley, K. L., Bays, G. L., & Ohde, R. N. (2001). Phonetic properties of aphasic-apraxic speech: A modified narrow transcription analysis. *Aphasiology*, 15(12), 1125-1142.

Instrucciones: “A continuación le voy a pedir que diga diferentes cosas. Estas cosas tienen un rango amplio de dificultad. No se preocupe si no puede decir todo perfectamente – lo que buscamos es entender cuáles son las cosas más difíciles y entender cómo intenta decirlas. Solamente haga lo mejor que pueda”

| I. “Por favor repita estos sonidos después de mí.” |               |         |              |              |
|----------------------------------------------------|---------------|---------|--------------|--------------|
|                                                    | Transcripción | Fluidez | Código Duffy | Código Porch |
| 1. /a/                                             |               |         |              |              |
| 2. /o/                                             |               |         |              |              |
| 3. /u/                                             |               |         |              |              |
| 4. /e/                                             |               |         |              |              |
| 5. /i/                                             |               |         |              |              |
| 6. /pa/ (bilabial)                                 |               |         |              |              |
| 7. /fa/ (labiodental)                              |               |         |              |              |
| 8. /da/ (dental)                                   |               |         |              |              |
| 9. /na/ (alveolar)                                 |               |         |              |              |
| 10. /ya/ (palatal)                                 |               |         |              |              |
| 10. /ka/ (velar)                                   |               |         |              |              |

| II. “Por favor repita estas palabras.” |               |         |              |              |
|----------------------------------------|---------------|---------|--------------|--------------|
|                                        | Transcripción | Fluidez | Código Duffy | Código Porch |
| 1. Pipa                                |               |         |              |              |
| 2. Fífa                                |               |         |              |              |
| 3. Duda                                |               |         |              |              |
| 4. Nena                                |               |         |              |              |
| 5. Yoyo                                |               |         |              |              |
| 6. Chicha                              |               |         |              |              |
| 7. Lila                                |               |         |              |              |
| 8. Coco                                |               |         |              |              |
| 9. Jaja                                |               |         |              |              |
| 10. Raro                               |               |         |              |              |

Participante #:

Fecha:

| III. “Le voy a decir unas palabras que me gustaría que repitiera.” |               |         |              |              |
|--------------------------------------------------------------------|---------------|---------|--------------|--------------|
|                                                                    | Transcripción | Fluidez | Código Duffy | Código Porch |
| 1. Casa                                                            |               |         |              |              |
| Casada                                                             |               |         |              |              |
| Casarlos                                                           |               |         |              |              |
| Casamiento                                                         |               |         |              |              |
| 2. Dura                                                            |               |         |              |              |
| Duraba                                                             |               |         |              |              |
| Duradero                                                           |               |         |              |              |

| IV. “Ahora me gustaría que repitiera estas palabras tres veces, así:” (Repita <i>animal</i> tres veces con 1 segundo de pausa entre cada repetición. Diga las otras palabras solamente una vez.) |        |     |    |    |        |     |    |    |        |     |    |    |  |  |
|--------------------------------------------------------------------------------------------------------------------------------------------------------------------------------------------------|--------|-----|----|----|--------|-----|----|----|--------|-----|----|----|--|--|
| Codes                                                                                                                                                                                            | Trans. | Fl. | D. | P. | Trans. | Fl. | D. | P. | Trans. | Fl. | D. | P. |  |  |
| 1. Animal                                                                                                                                                                                        |        |     |    |    |        |     |    |    |        |     |    |    |  |  |
| 2. Blusa                                                                                                                                                                                         |        |     |    |    |        |     |    |    |        |     |    |    |  |  |
| 3. Flaco                                                                                                                                                                                         |        |     |    |    |        |     |    |    |        |     |    |    |  |  |
| 4. Crema                                                                                                                                                                                         |        |     |    |    |        |     |    |    |        |     |    |    |  |  |
| 5. Grano                                                                                                                                                                                         |        |     |    |    |        |     |    |    |        |     |    |    |  |  |
| 6. Ciudad                                                                                                                                                                                        |        |     |    |    |        |     |    |    |        |     |    |    |  |  |
| 7. Suave                                                                                                                                                                                         |        |     |    |    |        |     |    |    |        |     |    |    |  |  |
| 8. Calendario                                                                                                                                                                                    |        |     |    |    |        |     |    |    |        |     |    |    |  |  |
| 9. Temperatura                                                                                                                                                                                   |        |     |    |    |        |     |    |    |        |     |    |    |  |  |
| 10. Monotonía                                                                                                                                                                                    |        |     |    |    |        |     |    |    |        |     |    |    |  |  |

| V. “Ahora por favor repita las siguientes frases. Solamente las tiene que decir una vez.” <i>Sea cuidadoso en leer los modelos con habla conectada clara a una velocidad moderada.</i> |               |         |              |              |
|----------------------------------------------------------------------------------------------------------------------------------------------------------------------------------------|---------------|---------|--------------|--------------|
|                                                                                                                                                                                        | Transcripción | Fluidez | Código Duffy | Código Porch |
| 1. Abre la puerta                                                                                                                                                                      |               |         |              |              |
| 2. Venga aquí y siéntese                                                                                                                                                               |               |         |              |              |
| 3. ¿Le gustaría una taza de té?                                                                                                                                                        |               |         |              |              |

Participante #:

Fecha:

|                                                                                                                                                                                                                    |                         |
|--------------------------------------------------------------------------------------------------------------------------------------------------------------------------------------------------------------------|-------------------------|
| <b>VI.</b> “Respire profundo y repita “_____” tan rápida y tan constantemente como sea posible. Por ejemplo, así: ( <i>Provea un modelo de 2 a 3 segundos.</i> ) Continúe hasta que yo le indique que se detenga.” |                         |
| 1. ραραραραρ                                                                                                                                                                                                       | 3. κακακακακα           |
| 2. τατατατα                                                                                                                                                                                                        | 4. πατακα πατακα πατακα |

|                                                |               |         |              |              |
|------------------------------------------------|---------------|---------|--------------|--------------|
| <b>VII.</b> “Por favor ahora cuente de 1 a 5.” |               |         |              |              |
|                                                | Transcripción | Fluidez | Código Duffy | Código Porch |
| 1.                                             |               |         |              |              |
| 2.                                             |               |         |              |              |
| 3.                                             |               |         |              |              |
| 4.                                             |               |         |              |              |
| 5.                                             |               |         |              |              |

|                                                                               |               |         |              |              |
|-------------------------------------------------------------------------------|---------------|---------|--------------|--------------|
| <b>VIII.</b> “Por favor diga los días de la semana comenzando por el domingo” |               |         |              |              |
|                                                                               | Transcripción | Fluidez | Código Duffy | Código Porch |
| 1. Domingo                                                                    |               |         |              |              |
| 2. Lunes                                                                      |               |         |              |              |
| 3. Martes                                                                     |               |         |              |              |
| 4. Miércoles                                                                  |               |         |              |              |
| 5. Jueves                                                                     |               |         |              |              |
| 6. Viernes                                                                    |               |         |              |              |
| 7. Sábado                                                                     |               |         |              |              |

|                                                                                                                                                                                                                                                                                            |  |
|--------------------------------------------------------------------------------------------------------------------------------------------------------------------------------------------------------------------------------------------------------------------------------------------|--|
| <b>IX.</b> “Ahora me gustaría que cantáramos una canción. Por favor trate de que yo pueda oír cada palabra. ¿Puede por favor cantar “feliz cumpleaños?”                                                                                                                                    |  |
| 1. Qué tan bien realizó la melodía ____<br><i>0 = no hubo diferenciación de tono; 1 = presencia de melodía, pero no se parece a la de la canción; 2 = la melodía se parece a la de la canción, pero con frecuentes e importantes errores de tono; 3 = pocos o menores errores de tono.</i> |  |
| 2. ¿Qué tan adecuada es la articulación? ( <i>brevemente comente acerca de la inteligibilidad, variación, y severidad de las dificultades de articulación</i> )                                                                                                                            |  |

Participante #:

Fecha:

**X. Conversación y habla narrativa.** “Ahora me gustaría que me contara como hace un sándwich (o emparedado).”

*Transcriba y describa una muestra de 1 minuto de su habla descriptiva o narrativa. Use el respaldo de la hoja si es necesario.*
