# Supplementary material
Source: publisher figshare collection journal article supplement (https://asha.figshare.com/articles/dataset/_/19241847)

**Supplemental Material S1.** Example of practice sentences and related images.

| Sentence                                      | Number of words | Number of syllables | Syllabic stress         |
|-----------------------------------------------|-----------------|---------------------|-------------------------|
| Vaso de leche<br><i>[Glass of milk]</i>       |                 |                     |                         |
| Jugo de fresa<br><i>[Strawberry smoothie]</i> | 3               | 5                   | <u>S</u> S S <u>S</u> S |
| Jarra de vino<br><i>[Jar of wine]</i>         |                 |                     |                         |

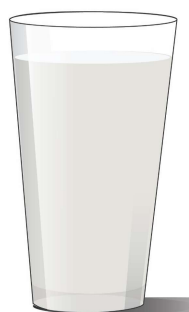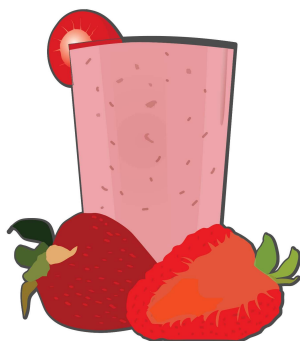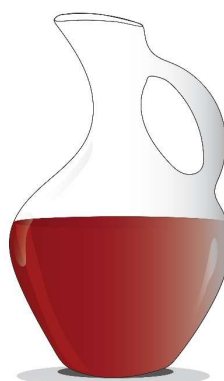

Supplement: Supplementary file 5 [file 1]
